# Supplementary material for: HIF1A Reduces Acute Lung Injury by Optimizing Carbohydrate Metabolism in the Alveolar Epithelium
Source: PLoS Biol. 2013 Sep 24;11(9):e1001665. doi: 10.1371/journal.pbio.1001665 (PMC3782424; doi:10.1371/journal.pbio.1001665)
Supplement: Table S1 — Microarray analysis. Human alveolar epithelial cells (Calu-3) were exposed to stretch conditions as an in vitro model for ventilator-induced ALI (24 h stretch at 30% intensity; http://www.ncbi.nlm.nih.gov/projects/geo/query/acc.cgi?acc=GSE27128). A subset of HIF1A-dependent genes were confirmed utilizing real-time RT-PCR and Western blotting. Significant changes in gene expression are displayed as fold change (p<0.05). Confirmation by real-time RT-PCR and Western blotting (unpublished data). (XLSX) [file pbio.1001665.s009.xlsx]

## Sheet: Sheet1
	Gene	Gene Description	Change Transcript (Microarray)	Real-time RT-PCR	Western blot	Murine VILI
1	MYBL2	v-myb myeloblastosis viral oncogene homolog (avian)-like 2	9.4 +/- 3.0	Conf.
2	CTGF	Connective tissue growth factor	8.6 +/- 1.5	Conf.		Conf.
3	BIRC5	Survivin	6.9 +/- 3.2	Conf.		Conf.
4	CXCR4	Chemokine (CXC motif) receptor 4	4.2 +/- 1.4	Conf.		Conf.
5	MMP1	Matrix metaloprotesase 1	4 +/- 1.6	Conf.
6	EDN1	Endothelin 1	4 +/- 1.2	Conf.
7	IL1RN	Interleukin 1 receptor	3.5 +/- 1.4	Conf.		Conf.
8	IL-1B	Interleukin 1B	3.5 +/- 1.3	Conf.	ELISA	Conf.
9	A2BAR	A2B adenosine receptor	3.4 +/- 0.95	Conf.	Conf.	Conf.
10	IL 1A	Interleukin 1A	3.15 +/- 1.5	Conf.	ELISA	Conf.
11	CD73	Extracellular conversion of AMP to adenosine	2.5 +/-0.3	Conf.	Conf.	Conf.
12	IL-8	Interleukin 8	2.4 +/- 0.3	Conf.	ELISA	Conf.
13	ENO1	Enolase 1 alpha	2.4 +/- 0.18	Conf.
14	CD55	Decay accelerating factor	2.3 +/- 0.5	Conf.	Conf.
15	HK2	Hexokinase 2	2.3 +/- 0.24	Conf.
16	CDC42	cell division cycle 42, GTP binding protein	2.2 +/- 0.23	Conf.
17	SAE1	SUMO1 activating enzyme	2.1 +/- 0.32	Conf.
18	PGK1	Phosphoglycerate kinase 1	2.0 +/- 0.15	Conf.
19	TGFA	Transforming growth factor alpha	1.8 +/- 0.37	Conf.	Conf.	Conf.
20	HIG2	Hypoxia- inducible protein 2	1.5 +/- 0.15	Conf.	Conf.	Conf.
